# Supplementary material for: Direct observation of phase transitions between delta- and alpha-phase FAPbI3via defocused Raman spectroscopy
Source: Royal Society of Chemistry journal article supplement (doi:10.1039/d3ta06411e), 2024-01-01
Supplement: d3ta06411e1.pdf [file d3ta06411e1.pdf]

## Supplementary Information

# Direct Observation of Phase Transitions between delta- and alpha-Phase FAPbI<sub>3</sub> via Defocused Raman Spectroscopy

Bernd K. Sturdza\*, Benjamin M. Gallant, Philippe Holzhey, Elisabeth A. Duijnste, Marko W. von der Leyen, Harry C. Sansom, Henry J. Snaith, Moritz K. Riede, and Robin J. Nicholas\*

*Clarendon Laboratory, Department of Physics, University of Oxford, Parks Road, Oxford OX1 3PU, United Kingdom*

E-mail: bernd.sturdza@physics.ox.ac.uk; robin.nicholas@physics.ox.ac.uk

### 1. Temperature dependent PL of FAPbI<sub>3</sub>

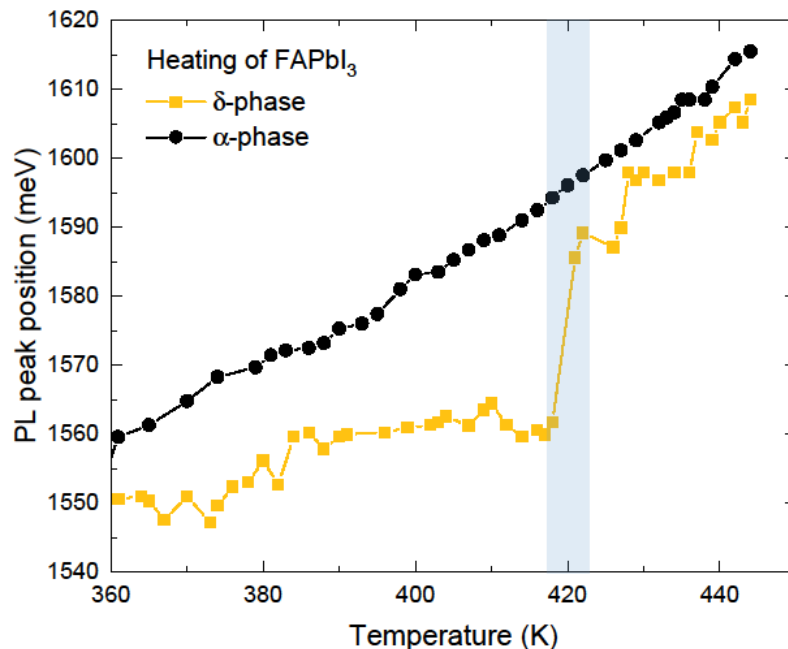

**Fig. S1: Temperature dependent Photoluminescence of FAPbI<sub>3</sub> single crystals.** Delta phase crystals can be converted back into the alpha phase by heating to temperatures above 420K at a heating rate of 3K/min, as can be seen by the change in PL peak position (highlighted in blue). Samples were excited with a 532nm laser.

## 2. Single Crystal X-ray Diffraction

Single crystal diffraction data were collected using an Oxford Diffraction (Agilent) SuperNova instrument with a molybdenum (0.71973 Å) microfocus X-ray tube. Unit cell indexation, detwinning, data integration, and reduction were performed using Rigaku CrysAlisPro software. The structures were solved and refined using SHELX-2013, implemented through Olex2 software. Structural and refinement parameters can be found in Tables S1 and S2. Images of the crystal structures are shown in Figure S2. FAPbI<sub>3</sub> crystals were found to be a two-component twin. The second twin component had a twin matrix of (0.6703 0.6620 -0.3384, -0.6677 0.3351 -0.6660, -0.3275 0.6716 0.6666) with respect to the first component. Twin components 1 and 2 contributed to 62(1)% and 38(1)% of the observed reflections, respectively. The structural solution was refined against the full data set (hklf5 file). No twinning was observed for the FAPbI<sub>3</sub>-M crystals.

CIF files of the two crystal types investigated in this work have been submitted to the CCDC. The deposition numbers are 2299142 for FAPbI<sub>3</sub> and 2299143 for FAPbI<sub>3</sub>-M.

### Images of model (Figure S2)

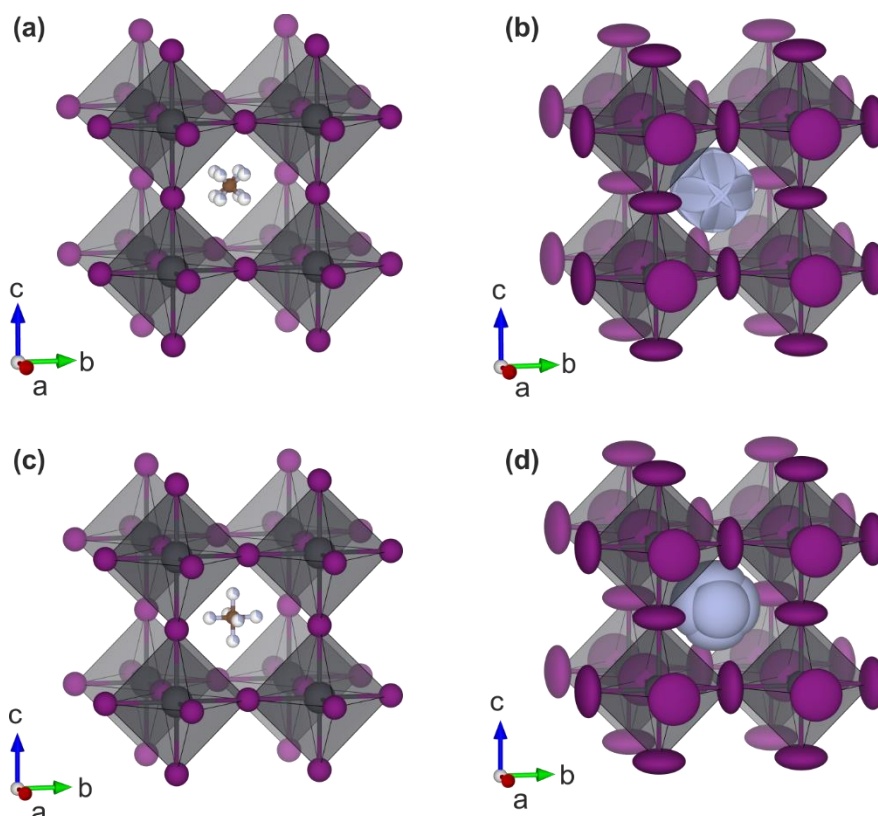

**Fig. S2.** The crystal structures solved from single crystal X-ray diffraction measured on FAPbI<sub>3</sub> crystals, showing without (a) and with (b) the 100% thermal ellipsoids. Similarly, the crystal structures of FAPbI<sub>3</sub>-M crystals, are shown without (c) and with (d) the 100% thermal ellipsoids. Both crystals are in the cubic  $\alpha$ -phase, and the electronic distribution of the organic cation can be considered quasi-spherical due to rotational disorder. Structural and refinement parameters can be found in Tables S1 and S2, respectively.

**Table S1.** Structural models for FAPbI<sub>3</sub> and FAPbI<sub>3</sub>-M crystals, refined against the single crystal X-ray diffraction data.

|                       | Atom | x       | y       | z        | Occupancy | Multiplicity | Equivalent Isotropic Displacement Parameters ( $\text{\AA}^2 \times 10^3$ ) |
|-----------------------|------|---------|---------|----------|-----------|--------------|-----------------------------------------------------------------------------|
| FAPbI <sub>3</sub>    | Pb   | 0       | 0       | 0        | 1         | 1            | 30.1(10)                                                                    |
|                       | I    | 0.5     | 0       | 0        | 1         | 3            | 84.1(17)                                                                    |
|                       | C    | 0.5     | 0.5     | 0.5      | 1         | 1            | 110(60)                                                                     |
|                       | N    | 0.58(1) | 0.58(1) | 0.58(1)  | 0.25      | 8            | 150(100)                                                                    |
| FAPbI <sub>3</sub> -M | Pb   | 0       | 0       | 0        | 1         | 1            | 36.6(4)                                                                     |
|                       | I    | 0.5     | 0       | 0        | 1         | 3            | 89.4(6)                                                                     |
|                       | C    | 0.5     | 0.5     | 0.5      | 1         | 1            | 170(40)                                                                     |
|                       | N    | 0.5     | 0.5     | 0.337(6) | 0.33      | 6            | 131(19)                                                                     |

**Table S2.** Parameters of the crystal structure models refined against the single crystal X-ray diffraction data.

| Identification code                         | exp_001_twin1_hklf5 ( <b>FAPbI<sub>3</sub></b> )  | exp_246 ( <b>FAPbI<sub>3</sub>-M</b> )                      |
|---------------------------------------------|---------------------------------------------------|-------------------------------------------------------------|
| Empirical formula                           | C I <sub>3</sub> N <sub>2</sub> Pb                | C I <sub>3</sub> N <sub>2</sub> Pb                          |
| Formula weight                              | 627.92                                            | 627.92                                                      |
| Temperature/K                               | 293(2)                                            | 293(2)                                                      |
| Crystal system                              | cubic                                             | cubic                                                       |
| Space group                                 | <i>Pm-3̄m</i>                                     | <i>Pm-3̄m</i>                                               |
| a/Å                                         | 6.36382(16)                                       | 6.35293(19)                                                 |
| b/Å                                         | 6.36382(16)                                       | 6.35293(19)                                                 |
| c/Å                                         | 6.36382(16)                                       | 6.35293(19)                                                 |
| α/°                                         | 90                                                | 90                                                          |
| β/°                                         | 90                                                | 90                                                          |
| γ/°                                         | 90                                                | 90                                                          |
| Volume/Å <sup>3</sup>                       | 257.724(19)                                       | 256.40(2)                                                   |
| Z                                           | 1                                                 | 1                                                           |
| ρ <sub>calc</sub> /g/cm <sup>3</sup>        | 4.046                                             | 4.067                                                       |
| μ/mm <sup>-1</sup>                          | 25.275                                            | 25.406                                                      |
| F(000)                                      | 261.0                                             | 261.0                                                       |
| Crystal size/mm <sup>3</sup>                | 0.2 × 0.15 × 0.1                                  | 0.1 × 0.15 × 0.25                                           |
| Radiation                                   | Mo Kα (λ = 0.71073)                               | Mo Kα (λ = 0.71073)                                         |
| 2θ range for data collection/°              | 6.402 to 59.1                                     | 9.074 to 57.526                                             |
| Index ranges                                | -8 ≤ h ≤ 7, -8 ≤ k ≤ 8, -8 ≤ l ≤ 7                | -8 ≤ h ≤ 5, -6 ≤ k ≤ 5, -3 ≤ l ≤ 8                          |
| Reflections collected                       | 274                                               | 352                                                         |
| Independent reflections                     | 274 [R <sub>sigma</sub> = 0.0173]                 | 91 [R <sub>int</sub> = 0.0346, R <sub>sigma</sub> = 0.0296] |
| Data/restraints/parameters                  | 274/0/9                                           | 91/0/9                                                      |
| Goodness-of-fit on F <sup>2</sup>           | 1.136                                             | 1.113                                                       |
| Final R indexes [I >= 2σ (I)]               | R <sub>1</sub> = 0.0636, wR <sub>2</sub> = 0.1659 | R <sub>1</sub> = 0.0224, wR <sub>2</sub> = 0.0388           |
| Final R indexes [all data]                  | R <sub>1</sub> = 0.0656, wR <sub>2</sub> = 0.1695 | R <sub>1</sub> = 0.0265, wR <sub>2</sub> = 0.0400           |
| Largest diff. peak/hole / e Å <sup>-3</sup> | 1.29/-1.26                                        | 0.42/-0.65                                                  |

### 3. Spot size Measurements

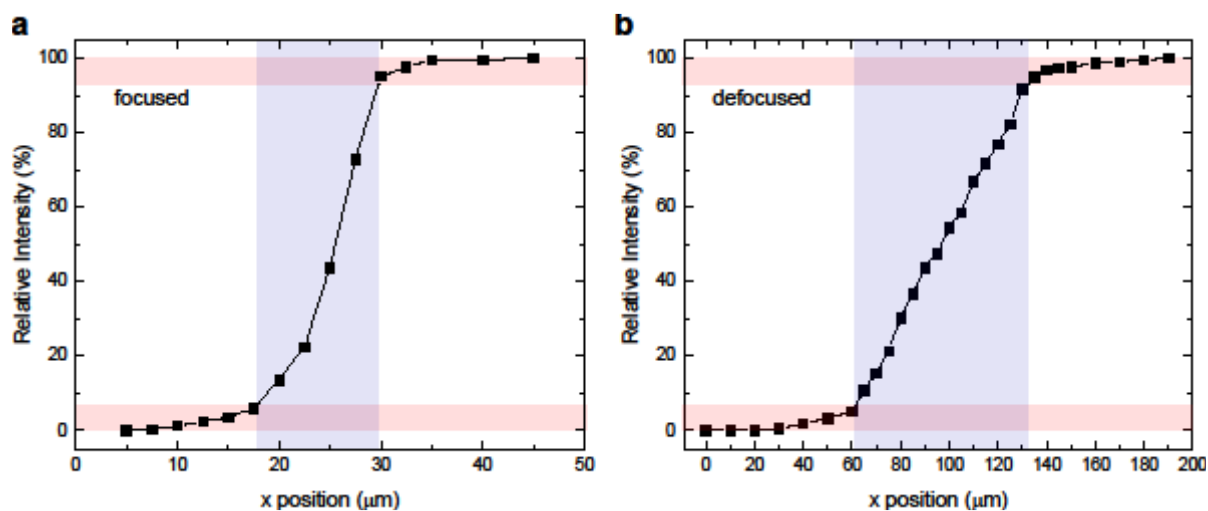

**Fig. S3: Laser spot size measurements for the two Raman configurations.** The laser spot was moved across the edge of a Silicon wafer with a micrometre stage. The limits of the 1/e<sup>2</sup> intensity profile are highlighted in red and the diameter of the spot is highlighted in blue. **a)** Data for the focused and **b)** defocused Raman setup.

### 4. Molecular modes of FA<sup>+</sup> in FAPbI<sub>3</sub> crystals

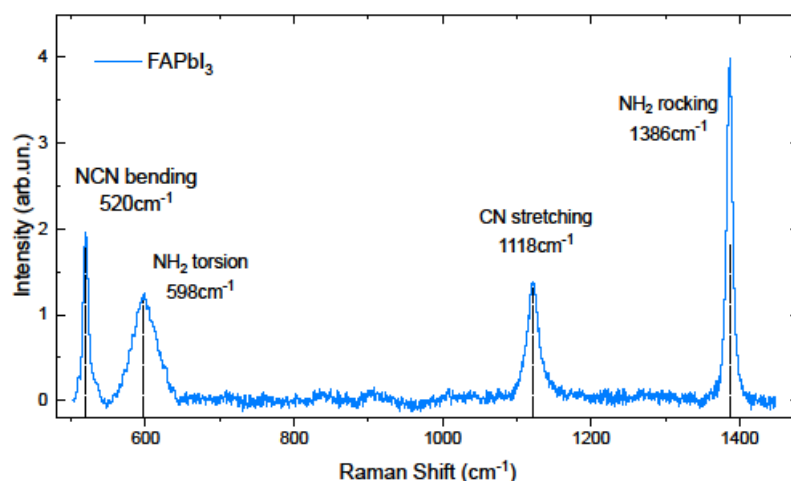

**Fig. S4: Molecular Raman modes of FA<sup>+</sup> in FAPbI<sub>3</sub> single crystals.** The spectra were acquired with the defocused setup with a 50x600s acquisition time and combined at 1000 cm<sup>-1</sup> after background subtraction. The four molecular vibrations and their theoretically expected positions are indicated in black.
